# Supplementary material for: “Seeing” Data Like an Expert: An Eye-Tracking Study Using Graphical Data Representations
Source: Atypon-hosted journal article supplement (doi:10.1187/cbe.18-06-0102), 2019-08-09
Supplement: combinedsupmats.pdf [file combinedsupmats.pdf]

# Supplemental Material

*CBE—Life Sciences Education*

Harsh *et al.*

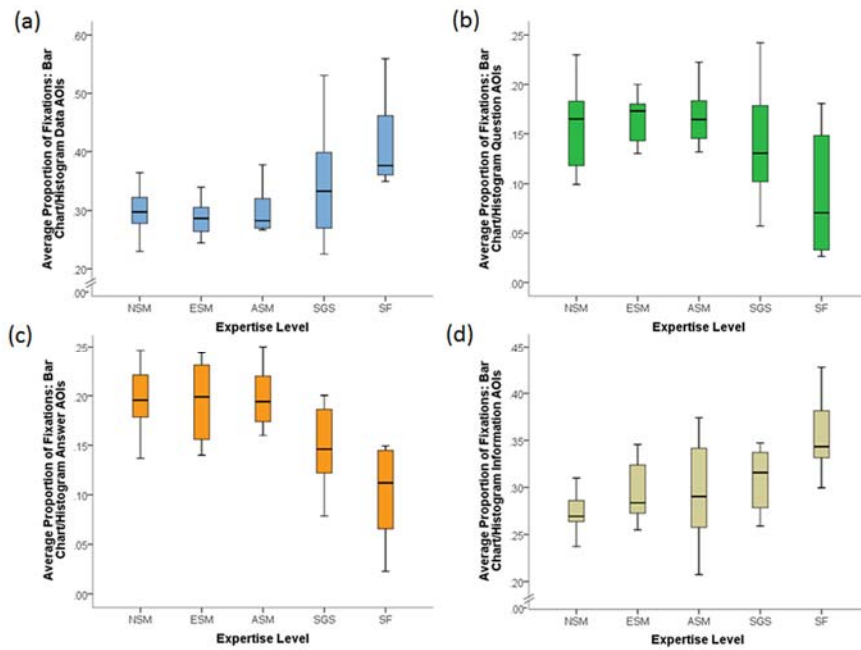

Supplemental Figure 1. Boxplots representing (thick line indicates median) average proportion of fixations for bar graphs/histograms to (a) Graph Data, (b) Questions, (c) Answer Options, and (d) Graph Information AOIs by expertise. ET data were collected from 36 participants including, 9 NSM, 7 ESM, 8 ASM, 6 SGS and 6 SF.

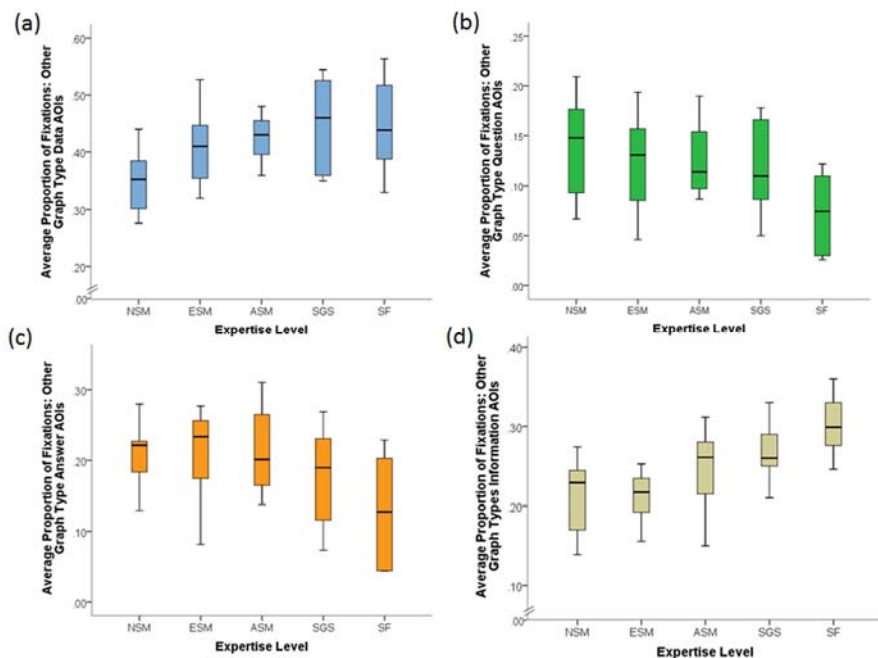

Supplemental Figure 2. Boxplots representing (thick line indicates median) average proportion of fixations for other graph types to (a) Graph Data, (b) Questions, (c) Answer Options, and (d) Graph Information AOIs by expertise. ET data were collected from 36 participants including, 9 NSM, 7 ESM, 8 ASM, 6 SGS and 6 SF.

Table 1. Description of graphing tasks used in the study

| <i>Graph</i> | <i>Graph Type (Category)</i> | <i>Context of Graph</i>                                          | <i>Nature of Question</i>         | <i>Graph Reading Level (based on Curcio, 1987)</i> | <i>Unique Feature(s)</i>                                                      | <i>Source of graph</i>                                                  | <i>Source of graph task</i> |
|--------------|------------------------------|------------------------------------------------------------------|-----------------------------------|----------------------------------------------------|-------------------------------------------------------------------------------|-------------------------------------------------------------------------|-----------------------------|
| 1            | Time Series (Line)           | Concentration of three greenhouse gases over time from 0 to 2005 | Identification of x-axis variable | Reading the data                                   | Second y-axis; Different units (ppm v. ppb) for greenhouse gas concentrations | International Panel on Climate Change: AR4 Climate Change Report (2007) | Maltese et al., 2015        |

|              |                                                   |                                                                                                  |                                                                                     |                                                    |                                               |                                                                                                                                            |                             |
|--------------|---------------------------------------------------|--------------------------------------------------------------------------------------------------|-------------------------------------------------------------------------------------|----------------------------------------------------|-----------------------------------------------|--------------------------------------------------------------------------------------------------------------------------------------------|-----------------------------|
| 2            | Vertical Bar Graph (Bar/Histogram)                | Estimated AIDS cases in young children from 1992-2005                                            | Identification of dependent variable                                                | Reading the data                                   |                                               | CDC National Health Report: leading causes of morbidity and mortality and associated behavioral risk and protective factors (2014)         | Maltese et al., 2015        |
| 3            | Vertical Bar Graph (Bar/Histogram)                | Competitive eating records of 19 differing food by weight and rate of ingestion                  | Interpretation of data point                                                        | Reading the data                                   | Second y-axis; Images of food types on graph  | Brown University: Visualizing Information course page                                                                                      | Maltese et al., 2015        |
| 4            | Pie Chart (Other)                                 | Sources of Nitrogen (n=9) in the Chesapeake Bay                                                  | Interpretation of data point relative to others                                     | Reading between the data                           |                                               | Chesapeake Bay Program. Milestones for Reducing Nitrogen and Phosphorus (2011)                                                             | Maltese et al., 2015        |
| 5            | Whitaker Diagram (Other)                          | Diagram of biome (n=8) precipitation and temperature                                             | Interpretation of data point relative to others                                     | Reading between the data                           |                                               | Miller & Levine (2010) Biology (high school textbook)                                                                                      | Maltese et al., 2015        |
| 6            | Combined Graph: Vertical Bar & Line Graph (Other) | Daily and total tornado events in the US during 2008                                             | Interpretation of data point relative to others                                     | Reading between the data                           | Second y-axis; Combination bar and line graph | NOAA National Centers for Environmental Information, State of the Climate: Tornadoes for Annual 2008 (2009)                                | Maltese et al., 2015        |
| 7            | Line Graph (Line)                                 | Automobile fuel economy by speed over three decades                                              | Estimate fuel usage of vehicles using slope between data points                     | Reading between the data                           |                                               | Department of Energy Transportation Energy Book, Edition 20 (2000)                                                                         | Maltese et al., 2015        |
| 8            | Horizontal Bar Graph (Bar/Histogram)              | Percentage of overweight and obese adults by country (n=7) in 1980 and 2008                      | Identification of multiple independent variables                                    | Reading between the data                           | Multi-bar graph                               | Overseas Development Institute Future Diets Report (2014)                                                                                  | Designed for this study     |
| <i>Graph</i> | <i>Graph Type (Category)</i>                      | <i>Context of Graph</i>                                                                          | <i>Nature of Question</i>                                                           | <i>Graph Reading Level (based on Curcio, 1987)</i> | <i>Unique Feature(s)</i>                      | <i>Source of graph</i>                                                                                                                     | <i>Source of graph task</i> |
| 9            | Scatterplot (Other)                               | Measurement of Nitrogen and Phosphorus pollution from agricultural fertilizer in four ecosystems | Inferring the relationship between nitrogen and phosphorus inputs by ecosystem type | Reading between the data                           |                                               | Picone, Chris, et al. "Assessing gains in undergraduate students' abilities to analyze graphical data." Teaching Issues and Experiments in | Piccone et al., 2007        |

|    |                                                   |                                                                                                                       |                                                                                                                                           |                          |                                                                               |                                                                         |                         |
|----|---------------------------------------------------|-----------------------------------------------------------------------------------------------------------------------|-------------------------------------------------------------------------------------------------------------------------------------------|--------------------------|-------------------------------------------------------------------------------|-------------------------------------------------------------------------|-------------------------|
|    |                                                   |                                                                                                                       |                                                                                                                                           |                          |                                                                               | Ecology 5 (2007): 1-54.                                                 |                         |
| 10 | Time Series<br>(Line)                             | Concentration of three greenhouse gases over time from 0 to 2005                                                      | Determination of highest gain in greenhouse gas concentration over time by taking into account variable units and relative rate of change | Reading beyond the data  | Second y-axis; Different units (ppm v. ppb) for greenhouse gas concentrations | International Panel on Climate Change: AR4 Climate Change Report (2007) | Maltese et al., 2015    |
| 11 | Connected Scatter Plot<br>(Line)                  | Physics of a baseball player's throw at three different speeds                                                        | Predict the minimum speed a baseball player would need to throw a ball to clear a tree at a given distance                                | Reading between the data |                                                                               | Blog by Dr. M. Richmond from RIT in response to a Wired article         | Designed for this study |
| 12 | Time Series<br>(Line)                             | Three panel time series graph showing global climate changes in temperature, sea level, and snow cover from 1961-1990 | Identification of a data point                                                                                                            | Reading between the data | Multiple panel display                                                        | IPCC, 2007: Climate Change 2007: the physical science basis.            | Maltese et al., 2015    |
| 13 | Combined Graph: Histogram & Line Graph<br>(Other) | Actual and projected human population size and growth every ten years from 1750 to 2050                               | Determination of population growth between two time periods                                                                               | Reading between the data | Histogram and line graph combination; second y-axis with different units      | United Nations Population Division :The World at Six Billion (2002)     | Maltese et al., 2015    |

| <i>Graph</i> | <i>Graph Type (Category)</i>        | <i>Context of Graph</i>                                                                                                                                 | <i>Nature of Question</i>                                                                                                                  | <i>Graph Reading Level(based on Curcio, 1987)</i> | <i>Unique Feature(s)</i> | <i>Source of graph</i>                                                                                                                                     | <i>Source of graph task</i> |
|--------------|-------------------------------------|---------------------------------------------------------------------------------------------------------------------------------------------------------|--------------------------------------------------------------------------------------------------------------------------------------------|---------------------------------------------------|--------------------------|------------------------------------------------------------------------------------------------------------------------------------------------------------|-----------------------------|
| 14           | Connected Scatter Plot (Line)       | Percent chance of a mother having a baby with Down Syndrome by age                                                                                      | Comparisons between five year periods of age to determine the greatest change in probability a mother will have a child with Down Syndrome | Reading between the data                          |                          | Graph common to webpages about Down Syndrome: Newberger, D. (2000) Down Syndrome: Prenatal Risk Assessment and Diagnosis. Am Fam Physician. 62(4):825-832. | Maltese et al., 2015        |
| 15           | Line Graph (Line)                   | Multiple line graph depicting energy consumption by six renewable and nonrenewable resources from 1970 to 2020                                          | Determination of which resource has the highest rate of relative growth over the period shown                                              | Reading between the data                          |                          | Tarbuck and Lutgens (2007) Foundations of Earth Science (middle school textbook)                                                                           | Maltese et al., 2015        |
| 16           | Line Graph (Line)                   | Multiple line graph depicting the relationship between sunshine, nutrients, phytoplankton, and zooplankton over a 12-month period in the Atlantic Ocean | Identify potential abiotic and biotic factors that contribute to increases in phytoplankton populations between August to September        | Reading beyond the data                           |                          | Tarbuck and Lutgens (2007) Foundations of Earth Science (middle school textbook)                                                                           | Maltese et al., 2015        |
| 17           | Stacked Bar Graph (Bar/Histogram)   | Three expanded stacked-bars depicting the distribution of Earth's water in ten categories                                                               | Identify the percentage of freshwater on Earth found in lakes                                                                              | Reading between the data                          |                          | Withgott (2011) Environmental Science: Your World, Your Turn (high school textbook)                                                                        | Designed for this study     |
| 18           | Three-Dimensional Bar Graph (Other) | Incidence of cardiovascular disease predicted by the number of four                                                                                     | Determine rate of heart disease between individuals dependent on the                                                                       | Reading between the data                          | 3-D graph                | Roger, Véronique L., et al. "Heart disease and stroke statistics--2012 update: a report from the American Heart Association." <i>Circulation</i> 125.1     | Designed for this study     |

|              |                                   | ideal health behaviors and four health risk factors.                                                                             | number of their risk factors                                                                                                     |                                                   |                                                                                        | (2012): e2-e220.                                                                                                                                                                                                                       |                             |
|--------------|-----------------------------------|----------------------------------------------------------------------------------------------------------------------------------|----------------------------------------------------------------------------------------------------------------------------------|---------------------------------------------------|----------------------------------------------------------------------------------------|----------------------------------------------------------------------------------------------------------------------------------------------------------------------------------------------------------------------------------------|-----------------------------|
| <i>Graph</i> | <i>Graph Type (Category)</i>      | <i>Context of Graph</i>                                                                                                          | <i>Nature of Question</i>                                                                                                        | <i>Graph Reading Level(based on Curcio, 1987)</i> | <i>Unique Feature(s)</i>                                                               | <i>Source of graph</i>                                                                                                                                                                                                                 | <i>Source of graph task</i> |
| 19           | Stacked Bar Graph (Bar/Histogram) | Diagram depicting changes in the global consumption of animal-source food between 1961 and 2009 by type and by region            | Identification of the regions with the smallest change in the consumption of a given animal-source food during the charted time. | Reading between the data                          | Complex stacked bar graph plotting four food types in 11 regions over two time periods | Overseas Development Institute Future Diets Report (2014)                                                                                                                                                                              | Designed for this study     |
| 20           | Age Pyramid (Other)               | Projected population age and sex structure of the US in 2010, 2030, and 2050                                                     | Identify the age range and gender with the least predicted population growth between 2010-2030                                   | Reading between the data                          |                                                                                        | Vincent, Grayson K., and Victoria AverilVelkoff. The next four decades: The older population in the United States: 2010 to 2050. No. 1138. US Department of Commerce, Economics and Statistics Administration, US Census Bureau, 2010. | Maltese et al., 2015        |
| 21           | Pie Chart (Other)                 | Three pie charts in image displaying the most common pollutants to the Chesapeake Bay and the nine sources of the pollutants     | Identification of the dependent variable                                                                                         | Reading between the data                          | Three pie charts included in same image                                                | United States Geological Society (USGS) Report                                                                                                                                                                                         | Maltese et al., 2015        |
| 22           | Bar Graph (Bar/Histogram)         | Details the total and average abundance of an annual citizen science Western Monarch count at overwintering sites from 1997-2013 | Interpret largest differences in the average number of butterflies caught over the time period                                   | Reading between the data                          | Standard error bars                                                                    | Xerxes Society website (a citizen science program) with graph also discussed in a 2014 Discover Magazine citizen science blog                                                                                                          | Designed for this study     |
| 23           | Scatterplot (Other)               | Annual number of days of lake ice on Lake Mendota, WI (from 1850 to 2000)                                                        | Differentiate between long-term trends and short-term fluctuations                                                               | Reading between the data                          | Apply the concept of slope                                                             | Piccone, Chris, et al. "Assessing gains in undergraduate students' abilities to analyze graphical data." <i>Teaching Issues and Experiments in Ecology</i> 5                                                                           | Piccone et al., 2007        |

|              |                              | demonstrating notable annual variation                                                                                                               |                                                                                              |                                                    |                          | (2007): 1-54.                                                       |                             |
|--------------|------------------------------|------------------------------------------------------------------------------------------------------------------------------------------------------|----------------------------------------------------------------------------------------------|----------------------------------------------------|--------------------------|---------------------------------------------------------------------|-----------------------------|
| <i>Graph</i> | <i>Graph Type (Category)</i> | <i>Context of Graph</i>                                                                                                                              | <i>Nature of Question</i>                                                                    | <i>Graph Reading Level (based on Curcio, 1987)</i> | <i>Unique Feature(s)</i> | <i>Source of graph</i>                                              | <i>Source of graph task</i> |
| 24           | Time Series (Line)           | Two line graph demonstrating the predator-prey interaction between snowshoe hares and lynx from 1850-1950                                            | Identify the relationship in data trends between species                                     | Reading between the data                           | Second y-axis            | Miller & Levine (2010) Biology (high school textbook)               | Designed for this study     |
| 25           | Histogram (Bar/Histogram)    | Two panel histogram, based on Peter and Rosemary Grant's work, representing the beak depth of the Galapagos finches before and after a drought event | Identify how the beak depth of the finch population changed from before to after the drought | Reading between the data                           | Two panel histogram      | Miller & Levine (2010) Biology (high school textbook)               | Maltese et al., 2015        |
| 26           | Bubble Chart (Other)         | Electricity consumption per person by gross domestic product for 24 countries                                                                        | Distinguish what relationship is being demonstrated by the visualization                     | Reading between the data                           | Bubble chart             | International Energy Agency (2009) Key World Energy Statistics 2009 | Designed for this study     |
